# Supplementary material for: Parameter calibration and stomatal conductance formulation comparison for boreal forests with adaptive population importance sampler in the land surface model JSBACH
Source: Copernicus journal article supplement (doi:10.5194/gmd-12-4075-2019), 2019-09-20
Supplement: Supplementary file [file gmd-12-4075-2019-supplement-title-page.pdf › gmd-12-4075-2019-supplement-title-page.pdf]

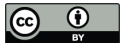

## *Supplement of*

# **Parameter calibration and stomatal conductance formulation comparison for boreal forests with adaptive population importance sampler in the land surface model JSBACH**

**Jarmo Mäkelä et al.**

*Correspondence to:* Jarmo Mäkelä ([jarmo.makela@fmi.fi](mailto:jarmo.makela@fmi.fi))

- [gmd-12-4075-2019-supplement-title-page.pdf](#)
- [F1-Bethy\\_chains.png](#)
- [F2-Bethy\\_annual\\_cycles.png](#)
- [F3-drought.png](#)
- [F4-wue.png](#)
- [S1-BB-par\\_chains.png](#)
- [S1-Bethy-par\\_chains.png](#)
- [S1-posteriors.png](#)
- [S2-BB\\_annual\\_cycles.png](#)
- [S2-Base\\_annual\\_cycles.png](#)
- [S2-F-K\\_annual\\_cycles.png](#)
- [S2-Leu\\_annual\\_cycles.png](#)
- [S2-USO\\_annual\\_cycles.png](#)
- [S3-tables.pdf](#)
- [states](#)
  - [README-states](#)
  - [apis-BB-apis\\_state.txt](#)
  - [apis-BB-glob\\_estimate.txt](#)
  - [apis-Bethy-apis\\_state.txt](#)
  - [apis-Bethy-glob\\_estimate.txt](#)

- dry-BB-sampling\_state.txt
- dry-BBL-sampling\_state.txt
- dry-Baseline-sampling\_state.txt
- dry-Bethy-sampling\_state.txt
- dry-Friend-sampling\_state.txt
- dry-Medlyn-sampling\_state.txt
- opt-BB-sampling\_state.txt
- opt-BBL-sampling\_state.txt
- opt-Baseline-sampling\_state.txt
- opt-Bethy-sampling\_state.txt
- opt-Friend-sampling\_state.txt
- opt-Medlyn-sampling\_state.txt

The copyright of individual parts of the supplement might differ from the CC BY 4.0 License.
